# Supplementary material for: Crystal structure and photoluminescence tuning of novel single-phase Ca8ZnLu(PO4)7:Eu2+,Mn2+ phosphors for near-UV converted white light-emitting diodes
Source: Royal Society of Chemistry journal article supplement (doi:10.1039/c9tc02494h), 2019-01-01
Supplement: c9tc02494h1.pdf [file c9tc02494h1.pdf]

## Supporting Information

### Crystal structure and Photoluminescence tuning of novel single-phase phosphors $\text{Ca}_8\text{ZnLu}(\text{PO}_4)_7$ : $\text{Eu}^{2+}$ , $\text{Mn}^{2+}$ for near-UV converted white light-emitting diodes

Jing Yan,<sup>a</sup> Ziwang Zhang,<sup>a</sup> Dawei Wen,<sup>b,c</sup> Jianbang Zhou,<sup>a</sup> Yiqin Xu,<sup>d</sup> Junhao Li,<sup>a</sup> Chong-Geng Ma,<sup>\*e,f</sup> Jianxin Shi<sup>a</sup> and Mingmei Wu<sup>\*a</sup>

<sup>a</sup> Key Laboratory of Bioinorganic and Synthetic Chemistry of Ministry of Education, School of Chemistry, Sun Yat-Sen University, Guangzhou 510275, P. R. China

<sup>b</sup> Institute of Multidisciplinary Research for Advanced Materials, Tohoku University, Sendai, Miyagi 980-0577, Japan

<sup>c</sup> School of Applied Physics and Materials, Wuyi University, Jiangmen, Guangdong, 529020, P.R. China

<sup>d</sup> Guangdong Institute of Semiconductor Industrial Technology, Guangzhou 510650, P. R. China

<sup>e</sup> Guangdong Research Institute of Rare-Metal, Guangdong Academy of Sciences, Guangzhou 510650, P. R. China

<sup>f</sup> College of Sciences, Chongqing University of Posts and Telecommunications, Chongqing 400065, P. R. China

\* Corresponding authors. Email addresses: ceswmm@mail.sysu.edu.cn; cgma.ustc@gmail.com.

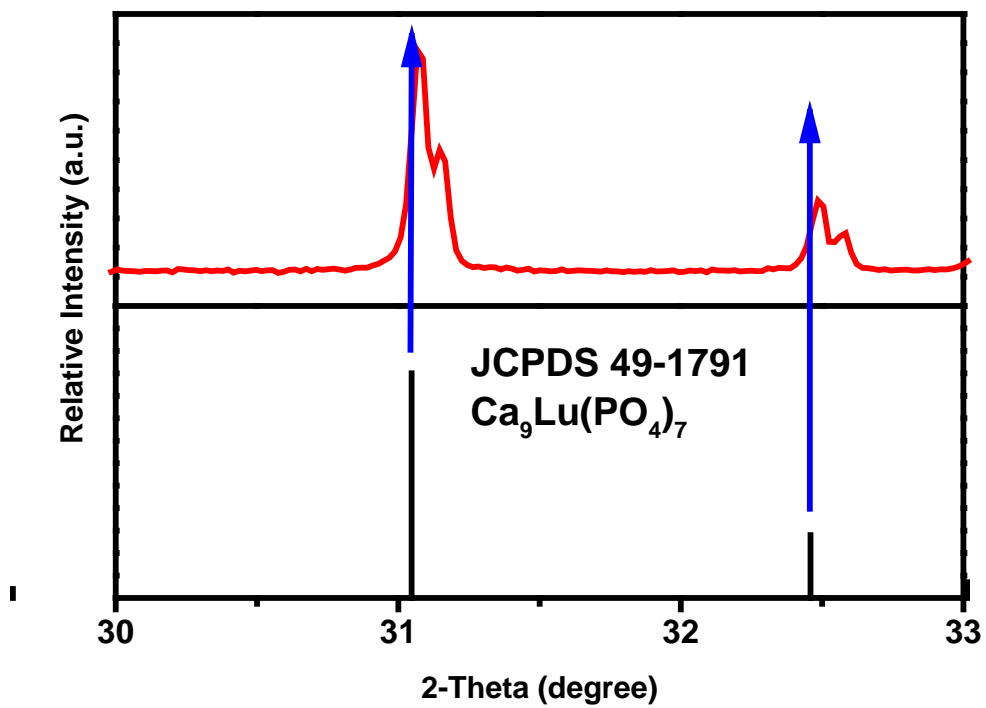

**Figure S1.** The magnified XRD pattern of CZLP host in the 2-theta range from 30° to 33°.

**Table S1.** Rietveld refinement data of the crystal structure of CZLP host.

| atom | symmetry | Wyckoff | <i>x</i>  | <i>y</i>  | <i>z</i>   | occu.  | U (Å <sup>2</sup> ) |
|------|----------|---------|-----------|-----------|------------|--------|---------------------|
| Ca1  | 18       | b       | 0.142(1)  | 0.2874(6) | 0.16667    | 0.7284 | 0.0462(9)           |
| Ca2  | 18       | b       | 0.2764(8) | 0.149(1)  | 0.30000(2) | 0.9578 | 0.0462(9)           |
| Ca3  | 18       | b       | 0.146(1)  | 0.2801(6) | 0.0606(2)  | 0.9808 | 0.0462(9)           |
| Zn1  | 18       | b       | 0.142(1)  | 0.2874(7) | 0.16667    | 0.1489 | 0.0462(9)           |
| Zn5  | 6        | a       | 0         | 0         | 0.2342(2)  | 0.552  | 0.0462(9)           |
| Lu1  | 18       | b       | 0.142(1)  | 0.2874(6) | 0.16667    | 0.1227 | 0.0462(9)           |
| Lu2  | 18       | b       | 0.2764(8) | 0.149(1)  | 0.30000(2) | 0.0422 | 0.0462(9)           |
| Lu3  | 18       | b       | 0.146(1)  | 0.2801(6) | 0.0606(2)  | 0.0192 | 0.0462(9)           |
| Lu5  | 6        | a       | 0         | 0         | 0.2342(2)  | 0.448  | 0.0462(9)           |
| P1   | 6        | a       | 0         | 0         | 0          | 1      | 0.036(2)            |
| P2   | 18       | b       | 0.350(1)  | 0.190(2)  | 0.2012(4)  | 1      | 0.036(2)            |
| P3   | 18       | b       | 0.318(1)  | 0.181(2)  | 0.0992(3)  | 1      | 0.036(2)            |
| O1   | 18       | b       | 0.351(2)  | 0.212(3)  | 0.2477(7)  | 1      | 0.020(2)            |
| O2   | 18       | b       | 0.010(3)  | 0.275(3)  | 0.3501(9)  | 1      | 0.020(2)            |
| O3   | 18       | b       | 0.432(2)  | 0.129(3)  | 0.1842(7)  | 1      | 0.020(2)            |
| O4   | 18       | b       | 0.202(2)  | 0.119(3)  | 0.1947(5)  | 1      | 0.020(2)            |
| O5   | 18       | b       | -0.013(3) | 0.269(3)  | 0.1143(7)  | 1      | 0.020(2)            |
| O6   | 18       | b       | 0.246(2)  | 0.250(3)  | 0.1177(8)  | 1      | 0.020(2)            |
| O7   | 18       | b       | 0.088(4)  | 0.157(2)  | 0.2722(5)  | 1      | 0.020(2)            |
| O8   | 18       | b       | 0.277(2)  | 0.165(2)  | 0.0593(5)  | 1      | 0.020(2)            |
| O9   | 18       | b       | 0.146(2)  | -0.003(2) | 0.4912(7)  | 1      | 0.020(2)            |
| O10  | 6        | a       | 0         | 0         | 0.0464(7)  | 1      | 0.020(2)            |

**Table S2.** Calculated and experimental crystal structural data of CZLP host. Coordinates of the crystallographic positions (in units of the lattice constants,  $(x, y, z)$  from left to right in one row) of all ions are given. The symbol “Z” stands for the number of chemical formula units in one conventional unit cell.

| <i>R3c</i>                |          | <i>CZLP</i>  |                        |          |          |                        |
|---------------------------|----------|--------------|------------------------|----------|----------|------------------------|
| (No. 161)                 |          | <i>Calc.</i> | <i>Exp.</i>            |          |          |                        |
| <i>a</i> , Å              |          | 10.20127     |                        |          |          | 10.4195                |
| <i>b</i> , Å              |          | 10.22330     |                        |          |          | 10.4195                |
| <i>c</i> , Å              |          | 36.74220     |                        |          |          | 37.2880                |
| $\alpha$ , °              |          | 89.62        |                        |          |          | 90                     |
| $\beta$ , °               |          | 90.15        |                        |          |          | 90                     |
| $\gamma$ , °              |          | 120.09       |                        |          |          | 120                    |
| <i>V</i> , Å <sup>3</sup> |          | 3315.26      |                        |          |          | 3505.9                 |
| <i>Z</i>                  |          | 6            |                        |          |          | 6                      |
| <i>M1</i> (18b)           | 0.12066  | 0.27053      | 0.16198                | 0.142    | 0.2874   | 0.16667                |
|                           | -0.27361 | -0.14358     | 0.16781                | -0.2874  | -0.1454  | 0.16667                |
|                           | 0.14388  | -0.13386     | 0.16473                | 0.1454   | -0.142   | 0.16667                |
|                           | -0.18423 | -0.39253     | 0.00246                | -0.18793 | -0.37927 | 3.33333E <sup>-6</sup> |
|                           | -0.20147 | 0.19183      | 8.48445E <sup>-4</sup> | -0.19133 | 0.18793  | 3.33333E <sup>-6</sup> |
|                           | 0.39521  | 0.20537      | 0.00146                | 0.37927  | 0.19133  | 3.33333E <sup>-6</sup> |
| <i>M2</i> (18b)           | -0.37672 | -0.17505     | -0.03122               | -0.39027 | -0.18433 | -0.03333               |
|                           | 0.17573  | -0.1988      | -0.0335                | 0.18433  | -0.20593 | -0.03333               |
|                           | 0.20361  | 0.37818      | -0.03455               | 0.20593  | 0.39027  | -0.03333               |
|                           | -0.45982 | 0.49027      | 0.13355                | -0.46073 | 0.48233  | 0.13333                |
|                           | -0.04795 | 0.4614       | 0.1331                 | -0.05693 | 0.46073  | 0.13333                |
|                           | -0.49457 | 0.03881      | 0.1315                 | -0.48233 | 0.05693  | 0.13333                |
| <i>M3</i> (18b)           | 0.13362  | 0.28436      | 0.06162                | 0.146    | 0.2801   | 0.0606                 |
|                           | -0.26971 | -0.14226     | 0.06114                | -0.2801  | -0.1341  | 0.0606                 |
|                           | 0.15433  | -0.12262     | 0.06103                | 0.1341   | -0.146   | 0.0606                 |
|                           | -0.19597 | -0.3971      | -0.10766               | -0.19923 | -0.38657 | -0.10607               |
|                           | -0.19838 | 0.20369      | -0.1081                | -0.18733 | 0.19923  | -0.10607               |
|                           | 0.37542  | 0.2006       | -0.10527               | 0.38657  | 0.18733  | -0.10607               |
| <i>M5</i> (6a)            | 0.37353  | -0.29036     | -0.1001                | 0.33333  | -0.33333 | -0.09913               |
|                           | -0.33492 | 0.33002      | 0.06938                | -0.33333 | 0.33333  | 0.06753                |
| <i>P1</i> (6a)            | -0.0012  | -0.00141     | 0.00314                | 0        | 0        | 0                      |
|                           | -0.34577 | 0.31302      | -0.16208               | 0        | 0        | -0.5                   |
| <i>P2</i> (18b)           | -0.32812 | -0.15106     | -0.13541               | -0.31667 | -0.14333 | -0.13213               |
|                           | 0.13325  | -0.17235     | -0.1313                | 0.14333  | -0.17333 | -0.13213               |
|                           | 0.18282  | 0.32737      | -0.13031               | 0.17333  | 0.31667  | -0.13213               |
|                           | -0.48496 | -0.47098     | 0.03627                | -0.49333 | -0.47667 | 0.03453                |
|                           | 0.01841  | 0.49401      | 0.03621                | 0.01667  | 0.49333  | 0.03453                |
|                           | 0.47527  | -0.01603     | 0.03622                | 0.47667  | -0.01667 | 0.03453                |
| <i>P3</i> (18b)           | 0.32412  | 0.18269      | 0.1004                 | 0.318    | 0.181    | 0.0992                 |
|                           | -0.17725 | 0.14459      | 0.10037                | -0.181   | 0.137    | 0.0992                 |

|         |          |          |          |          |          |          |
|---------|----------|----------|----------|----------|----------|----------|
|         | -0.14188 | -0.32488 | 0.09891  | -0.137   | -0.318   | 0.0992   |
|         | -0.4757  | -0.488   | -0.0653  | -0.47033 | -0.48567 | -0.06747 |
|         | -0.00557 | 0.48406  | -0.06666 | -0.01533 | 0.47033  | -0.06747 |
|         | 0.49141  | 0.01078  | -0.06637 | 0.48567  | 0.01533  | -0.06747 |
| O1(18b) | -0.35982 | -0.16838 | -0.09417 | -0.31567 | -0.12133 | -0.08563 |
|         | 0.09033  | -0.18874 | -0.09103 | 0.12133  | -0.19433 | -0.08563 |
|         | 0.18377  | 0.27322  | -0.09161 | 0.19433  | 0.31567  | -0.08563 |
|         | -0.47957 | -0.4245  | 0.07565  | -0.47233 | -0.45467 | 0.08103  |
|         | 0.05955  | 0.48409  | 0.0755   | 0.01767  | 0.47233  | 0.08103  |
|         | 0.42207  | -0.06458 | 0.0752   | 0.45467  | -0.01767 | 0.08103  |
| O2(18b) | 0.33097  | -0.05196 | 0.01384  | 0.34333  | -0.05833 | 0.01677  |
|         | 0.06079  | 0.39287  | 0.01362  | 0.05833  | 0.40167  | 0.01677  |
|         | -0.37179 | -0.32468 | 0.01446  | -0.40167 | -0.34333 | 0.01677  |
|         | 0.28386  | 0.28625  | -0.15359 | 0.265    | 0.275    | -0.1499  |
|         | -0.01261 | -0.28187 | -0.15277 | 0.01     | -0.265   | -0.1499  |
|         | -0.23742 | 0.01354  | -0.14723 | -0.275   | -0.01    | -0.1499  |
| O3(18b) | -0.26388 | -0.25025 | -0.14808 | -0.23467 | -0.20433 | -0.14913 |
|         | 0.21217  | -0.00832 | -0.14448 | 0.20433  | -0.03033 | -0.14913 |
|         | 0.02389  | 0.27101  | -0.14577 | 0.03033  | 0.23467  | -0.14913 |
|         | 0.3548   | 0.44046  | 0.02061  | 0.36367  | 0.46233  | 0.01753  |
|         | 0.08109  | -0.34335 | 0.02153  | 0.09867  | -0.36367 | 0.01753  |
|         | -0.43019 | -0.08314 | 0.02147  | -0.46233 | -0.09867 | 0.01753  |
| O4(18b) | 0.17324  | 0.11181  | 0.18116  | -0.46467 | -0.21433 | -0.13863 |
|         | 0.24186  | -0.23763 | -0.1394  | 0.21433  | -0.25033 | -0.13863 |
|         | 0.26238  | -0.49527 | -0.13333 | 0.25033  | 0.46467  | -0.13863 |
|         | -0.40722 | 0.43045  | 0.02965  | -0.41633 | 0.45233  | 0.02803  |
|         | -0.15829 | 0.42223  | 0.03012  | -0.13133 | 0.41633  | 0.02803  |
|         | -0.42154 | 0.15996  | 0.03155  | -0.45233 | 0.13133  | 0.02803  |
| O5(18b) | -0.02171 | 0.2233   | 0.11968  | -0.013   | 0.269    | 0.1143   |
|         | -0.21253 | -0.24075 | 0.11736  | -0.269   | -0.282   | 0.1143   |
|         | 0.24664  | 0.02143  | 0.11595  | 0.282    | 0.013    | 0.1143   |
|         | -0.08227 | -0.44478 | -0.0444  | -0.05133 | -0.39767 | -0.05237 |
|         | -0.3457  | 0.09599  | -0.05186 | -0.34633 | 0.05133  | -0.05237 |
|         | 0.44078  | 0.35398  | -0.04827 | 0.39767  | 0.34633  | -0.05237 |
| O6(18b) | 0.27045  | 0.28873  | 0.1161   | 0.246    | 0.25     | 0.1177   |
|         | -0.28598 | -0.01903 | 0.11307  | -0.25    | -0.004   | 0.1177   |
|         | 0.02187  | -0.27241 | 0.11085  | 0.004    | -0.246   | 0.1177   |
|         | -0.31112 | -0.39127 | -0.05089 | -0.32933 | -0.41667 | -0.04897 |
|         | -0.05428 | 0.32139  | -0.05462 | -0.08733 | 0.32933  | -0.04897 |
|         | 0.38915  | 0.07318  | -0.05471 | 0.41667  | 0.08733  | -0.04897 |
| O7(18b) | 0.41519  | -0.15458 | -0.05099 | 0.42133  | -0.17633 | -0.06113 |
|         | 0.16818  | -0.41679 | -0.06204 | 0.17633  | -0.40233 | -0.06113 |
|         | 0.43141  | -0.40984 | -0.05588 | 0.40233  | -0.42133 | -0.06113 |
|         | -0.23907 | -0.49582 | 0.10749  | -0.26433 | 0.49033  | 0.10553  |

|         |          |            |          |          |          |          |
|---------|----------|------------|----------|----------|----------|----------|
|         | -0.25551 | 0.23793    | 0.10803  | -0.24533 | 0.26433  | 0.10553  |
|         | 0.49594  | 0.25664    | 0.1086   | -0.49033 | 0.24533  | 0.10553  |
| O8(18b) | 0.29394  | 0.17012    | 0.05927  | 0.277    | 0.165    | 0.0593   |
|         | -0.14669 | 0.14103    | 0.05958  | -0.165   | 0.112    | 0.0593   |
|         | -0.13834 | -0.29634   | 0.05744  | -0.112   | -0.277   | 0.0593   |
|         | -0.4688  | 0.49789    | -0.10674 | -0.44533 | 0.49833  | -0.10737 |
|         | -0.05202 | 0.47717    | -0.10681 | -0.05633 | 0.44533  | -0.10737 |
|         | 0.49142  | -0.00339   | -0.1081  | -0.49833 | 0.05633  | -0.10737 |
| O9(18b) | 0.46891  | -0.35203   | 0.16145  | 0.47933  | -0.33633 | 0.15787  |
|         | 0.32461  | -0.20981   | 0.1568   | 0.33633  | -0.18433 | 0.15787  |
|         | 0.18047  | 0.49772    | 0.15757  | 0.18433  | -0.47933 | 0.15787  |
|         | -0.14478 | 1.05355E-4 | -0.00955 | -0.149   | -0.003   | -0.0088  |
|         | 0.14298  | 0.13879    | -0.01104 | 0.146    | 0.149    | -0.0088  |
|         | -0.01117 | -0.15157   | -0.0101  | 0.003    | -0.146   | -0.0088  |
| O10(6a) | 0.00227  | -0.00275   | 0.0451   | 0        | 0        | 0.0464   |
|         | -0.35616 | 0.31181    | -0.11986 | -0.33333 | 0.33333  | -0.12027 |

---

Notes: The Zn and Lu atoms in *M1* site for the calculated structural configuration are located in the crystallographic general positions 1 and 4, respectively, whereas those in *M5* site stay in the positions 2 and 1.

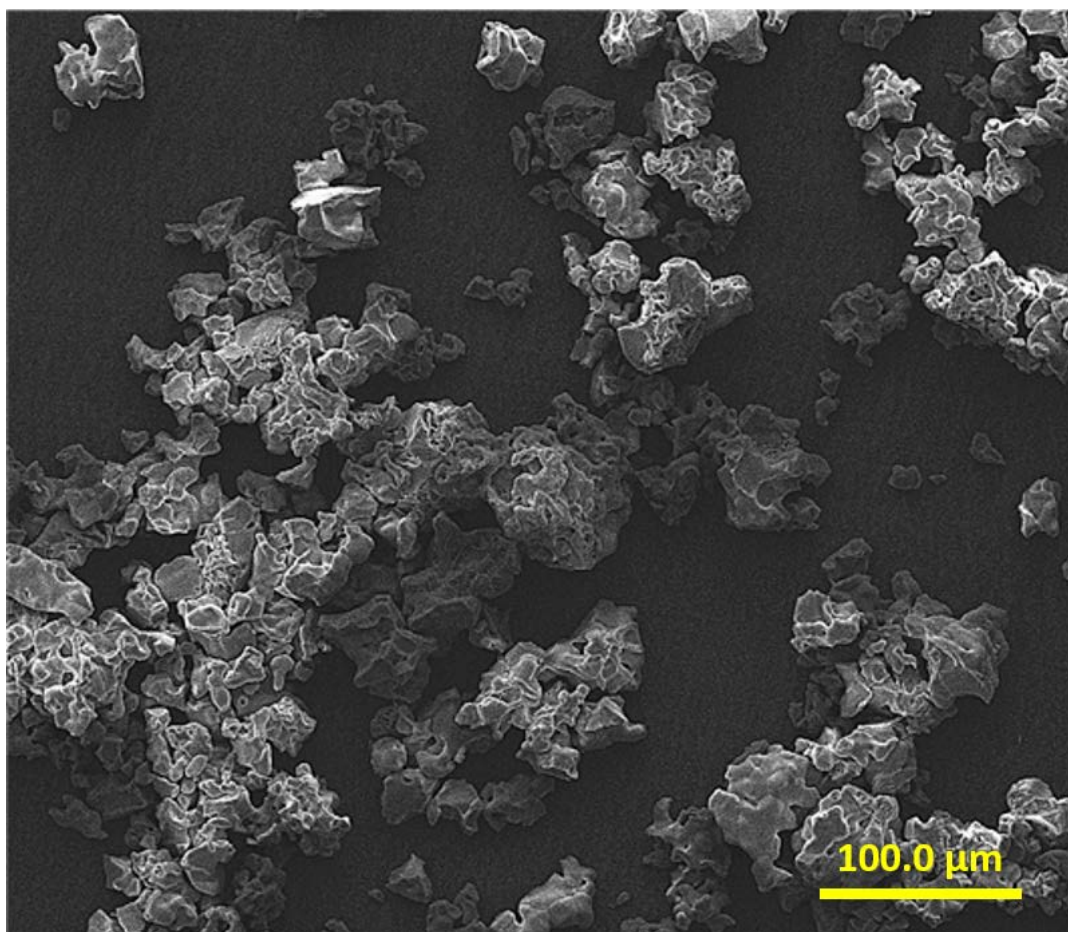

**Figure S2.** SEM image of CZLP: 0.03Eu<sup>2+</sup>.

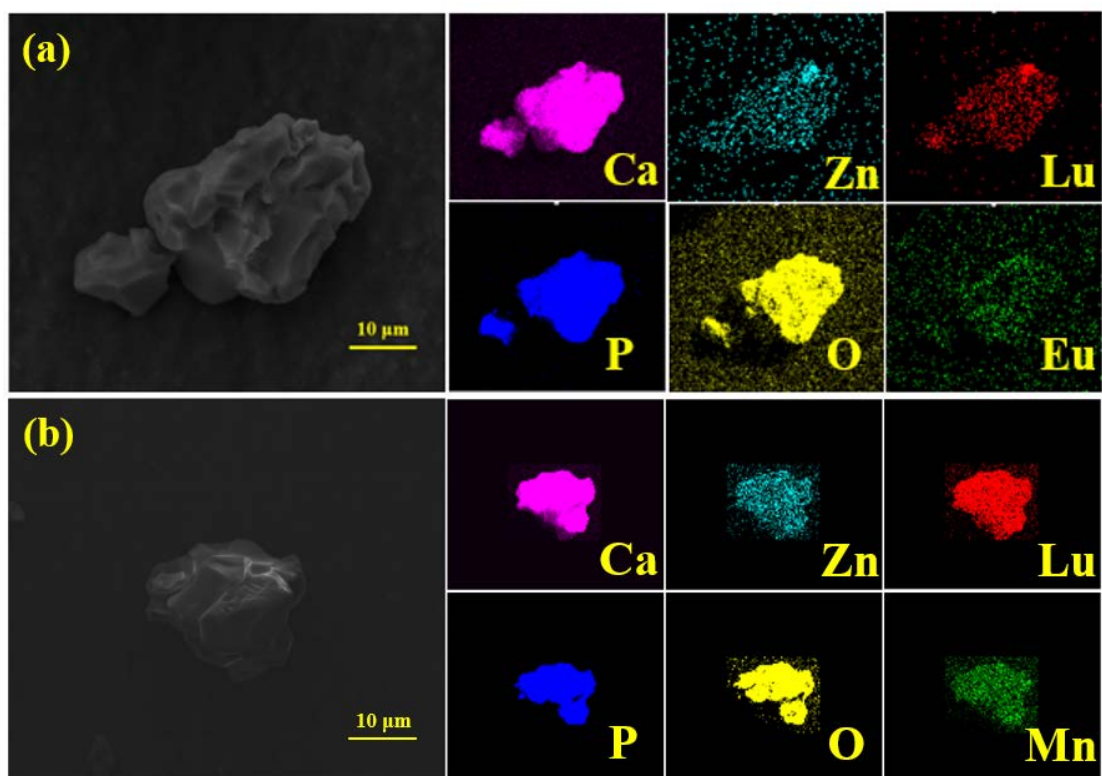

**Figure S3.** Element mappings of (a) CZLP: 0.03Eu<sup>2+</sup> and (b) CZLP: 0.20Mn<sup>2+</sup>.



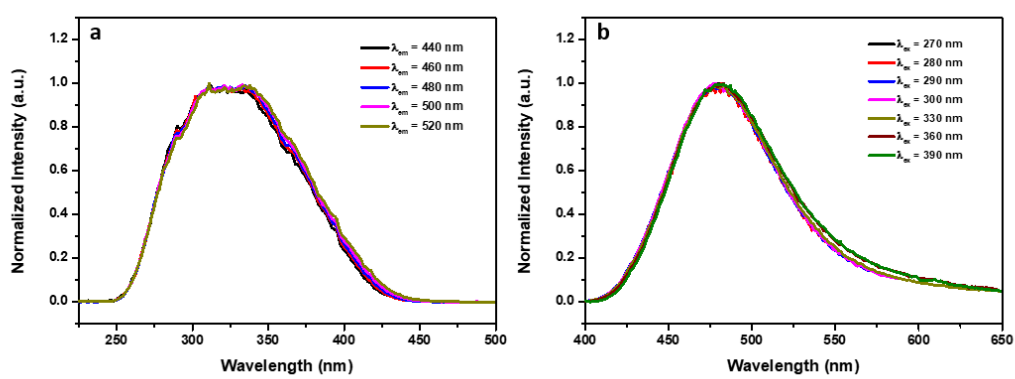

**Figure S4.** (a) Excitation ( $\lambda_{em}$  = 440, 460, 480, 500 and 520 nm) and (b) emission spectra ( $\lambda_{ex}$  = 270, 280, 290, 300, 330, 360 and 390 nm) of CZLP: 0.03Eu<sup>2+</sup> at RT.

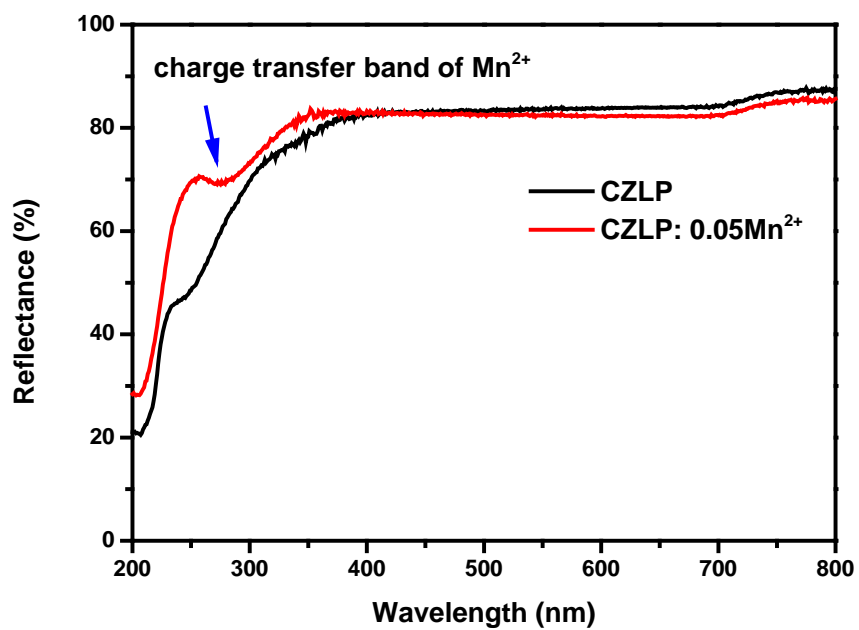

**Figure S5.** Diffuse reflectance spectra of CZLP and CZLP: 0.05Mn<sup>2+</sup>

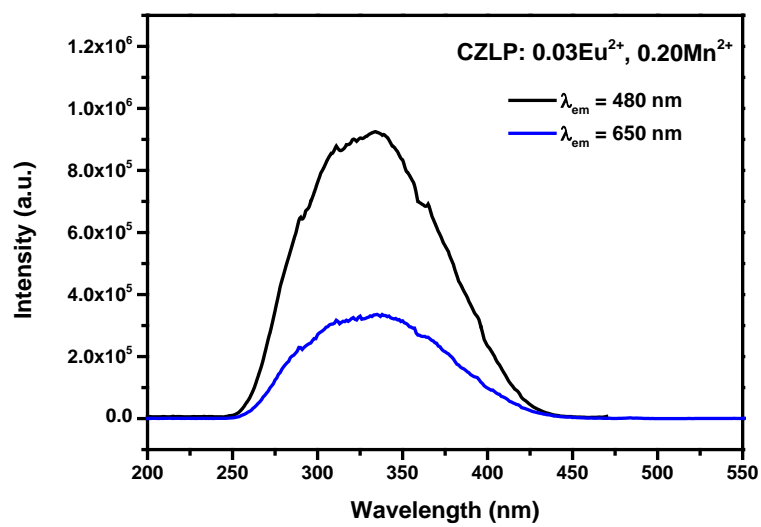

**Figure S6.** Excitation spectra of CZLP: 0.03Eu<sup>2+</sup>, 0.20Mn<sup>2+</sup> monitored at 480 nm and 650 nm.

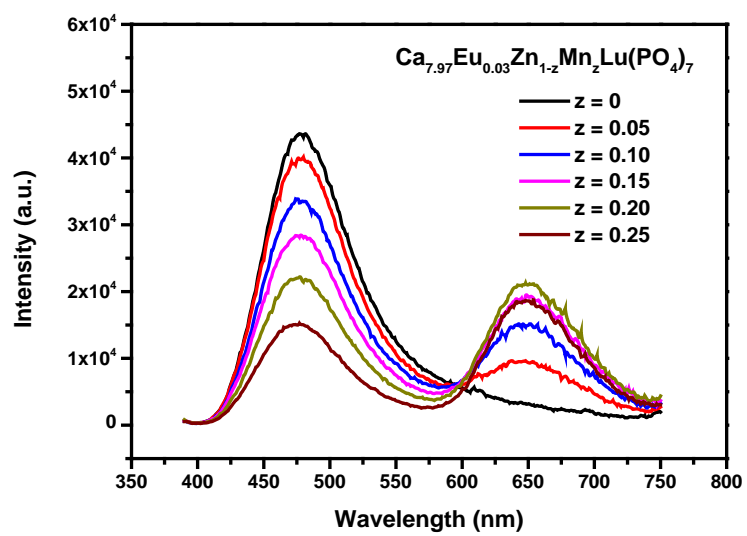

**Figure S7.** Emission spectra of CZLP: 0.03Eu<sup>2+</sup>, zMn<sup>2+</sup> (z = 0, 0.05, 0.10, 0.15, 0.20 and 0.25) measured at RT.

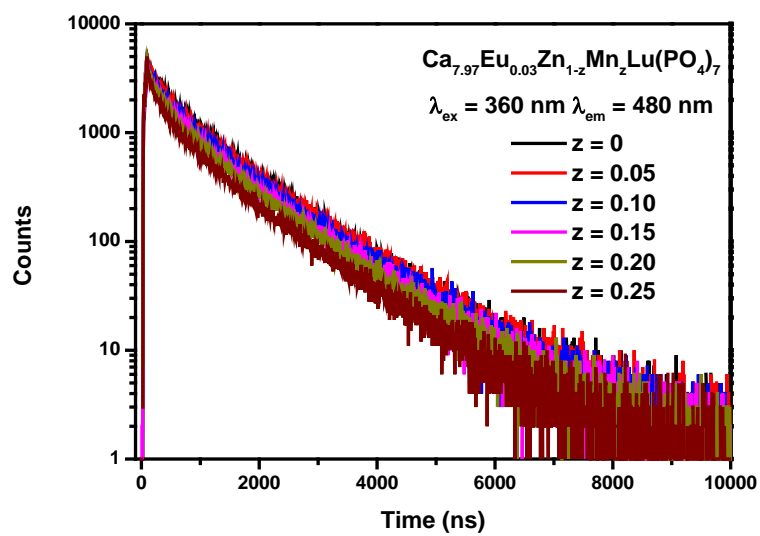

**Figure S8.** Luminescence decay curves of CZLP: 0.03Eu<sup>2+</sup>, zMn<sup>2+</sup> (z = 0, 0.05, 0.10, 0.15, 0.20 and 0.25) measured at RT.

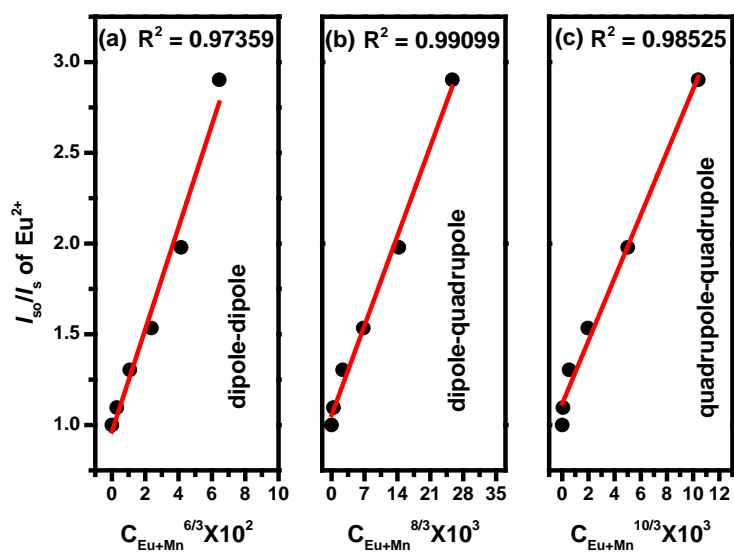

**Figure S9.** Dependence  $I_{so}/I_s$  of  $\text{Eu}^{2+}$  on  $C^{n/3}$  ( $n = 6, 8$  and  $10$ ).

**Table S3.** Chromatic coordinates ( $x, y$ ) of  $\text{Eu}^{2+}/\text{Mn}^{2+}$  singly-doped and co-doped CZLP.

| Point | sample                                         | Chromaticity coordinates |
|-------|------------------------------------------------|--------------------------|
| 1     | CZLP: $0.03\text{Eu}^{2+}$                     | (0.186, 0.292)           |
| 2     | CZLP: $0.20\text{Mn}^{2+}$                     | (0.677, 0.323)           |
| 3     | CZLP: $0.03\text{Eu}^{2+}, 0.05\text{Mn}^{2+}$ | (0.215, 0.272)           |
| 4     | CZLP: $0.03\text{Eu}^{2+}, 0.10\text{Mn}^{2+}$ | (0.247, 0.275)           |
| 5     | CZLP: $0.03\text{Eu}^{2+}, 0.15\text{Mn}^{2+}$ | (0.272, 0.273)           |
| 6     | CZLP: $0.03\text{Eu}^{2+}, 0.20\text{Mn}^{2+}$ | (0.302, 0.273)           |
| 7     | CZLP: $0.03\text{Eu}^{2+}, 0.25\text{Mn}^{2+}$ | (0.327, 0.267)           |
